# Supplementary material
Source: Royal Society of Chemistry journal article supplement (doi:10.1039/d6ay00052e)
Supplement: d6ay00052e1.pdf [file d6ay00052e1.pdf]

## Supplementary Data

|                                                                                                                                                                                                                                                                                                                                                                   |   |
|-------------------------------------------------------------------------------------------------------------------------------------------------------------------------------------------------------------------------------------------------------------------------------------------------------------------------------------------------------------------|---|
| <b>Figure s1:</b> (A) Scopus Generated Line and Bar Diagram for Greenness in Analytical Chemistry (B) Scopus Generated Line and Bar Diagram for Blueness in Analytical Chemistry (C) Scopus Generated Line and Bar Diagram for Whiteness in Analytical Chemistry (D) Scopus Generated Line and Bar Diagram for Artificial Intelligence in Analytical Chemistry .2 |   |
| <b>Figure s2:</b> Predicted UV-Vis spectrum from Laptop 1 for Pyronaridine Tetraphosphate (A) Trial 1 (B) Trail 2 (C) Trail 3 (D) Trail 4 .....                                                                                                                                                                                                                   | 3 |
| <b>Figure s3:</b> Predicted UV-Vis spectrum from Laptop 2 for Pyronaridine Tetraphosphate (A) Trail 1 (B) Trail 2 .....                                                                                                                                                                                                                                           | 3 |
| <b>Figure s4:</b> 3D Diagram with Hansen Space .....                                                                                                                                                                                                                                                                                                              | 4 |
| <b>Figure s5:</b> (A) Image with stage (B) Whole Setup Image for Smartphone Based Method .....                                                                                                                                                                                                                                                                    | 4 |
| <b>Figure s6:</b> Capturing Point for Smartphone Based Vector RGB Method.....                                                                                                                                                                                                                                                                                     | 5 |
| <b>Figure s7:</b> Settings for Photometrix Pro Software .....                                                                                                                                                                                                                                                                                                     | 5 |

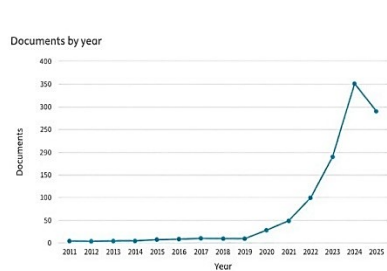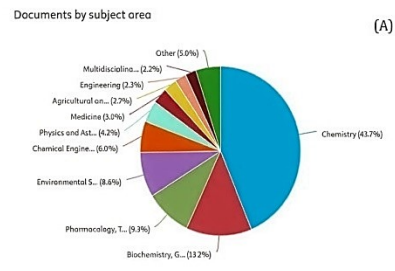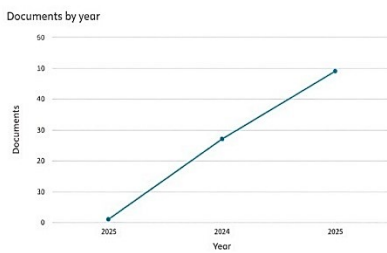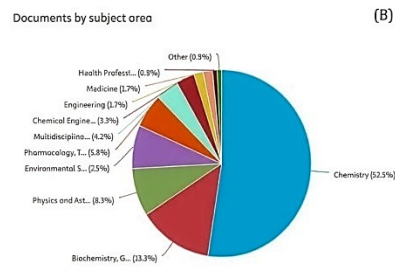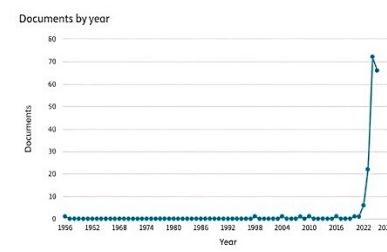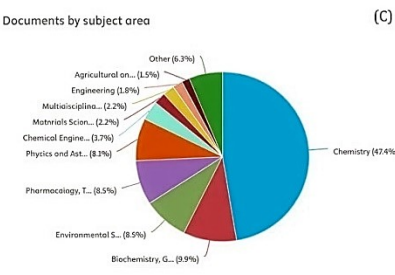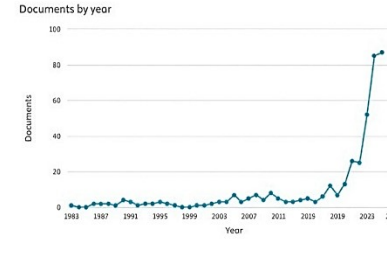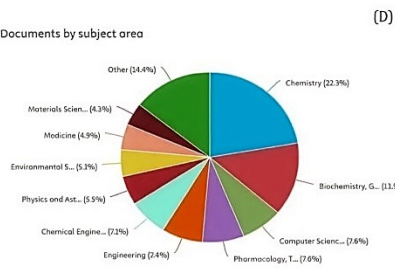

**Figure s1:** (A) Scopus Generated Line and Bar Diagram for Greenness in Analytical Chemistry (B) Scopus Generated Line and Bar Diagram for Blueness in Analytical Chemistry (C) Scopus Generated Line and Bar Diagram for Whiteness in Analytical Chemistry (D) Scopus Generated Line and Bar Diagram for Artificial Intelligence in Analytical Chemistry

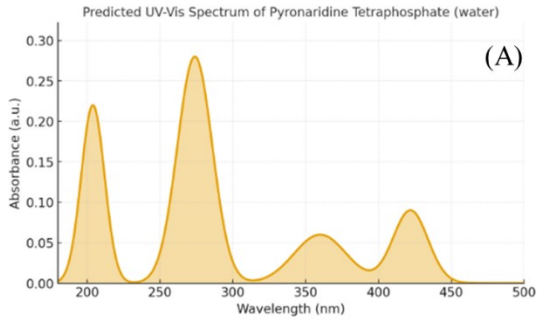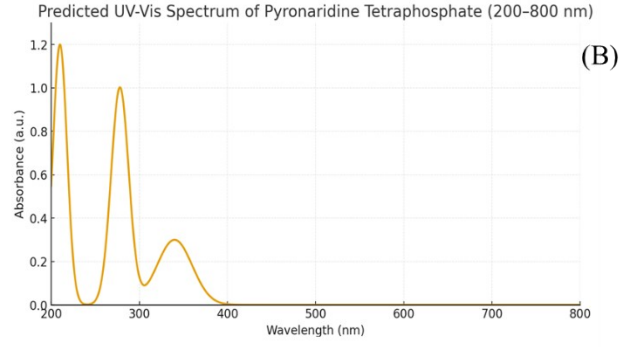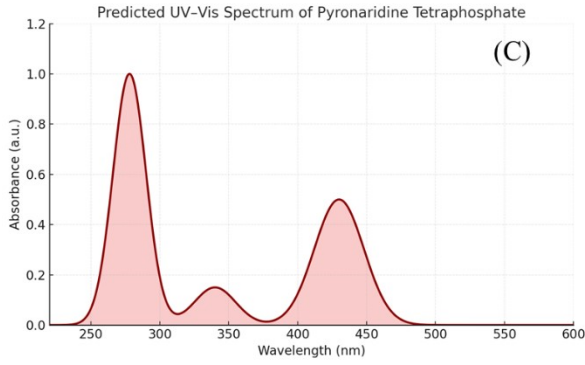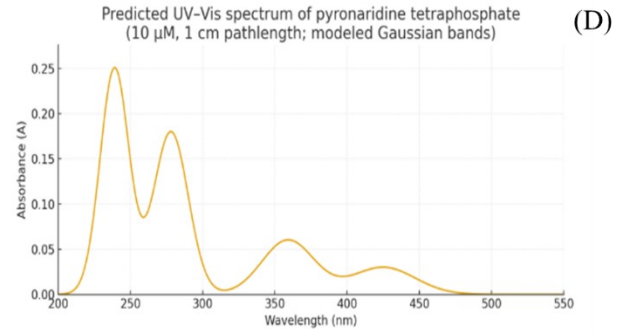

**Figure s2:** Predicted UV-Vis spectrum from Laptop 1 for Pyronaridine Tetrphosphate (A) Trial 1 (B) Trail 2 (C) Trail 3 (D) Trail 4

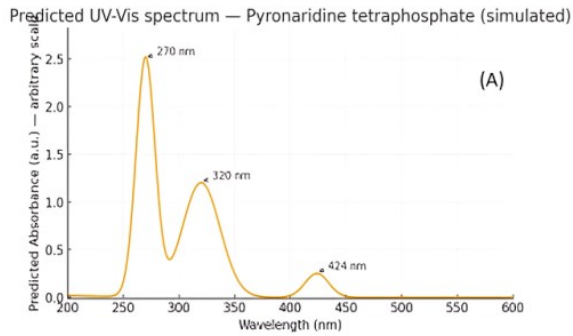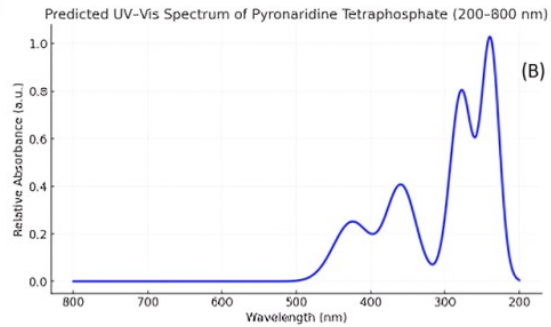

**Figure s3:** Predicted UV-Vis spectrum from Laptop 2 for Pyronaridine Tetrphosphate (A) Trail 1 (B) Trail 2

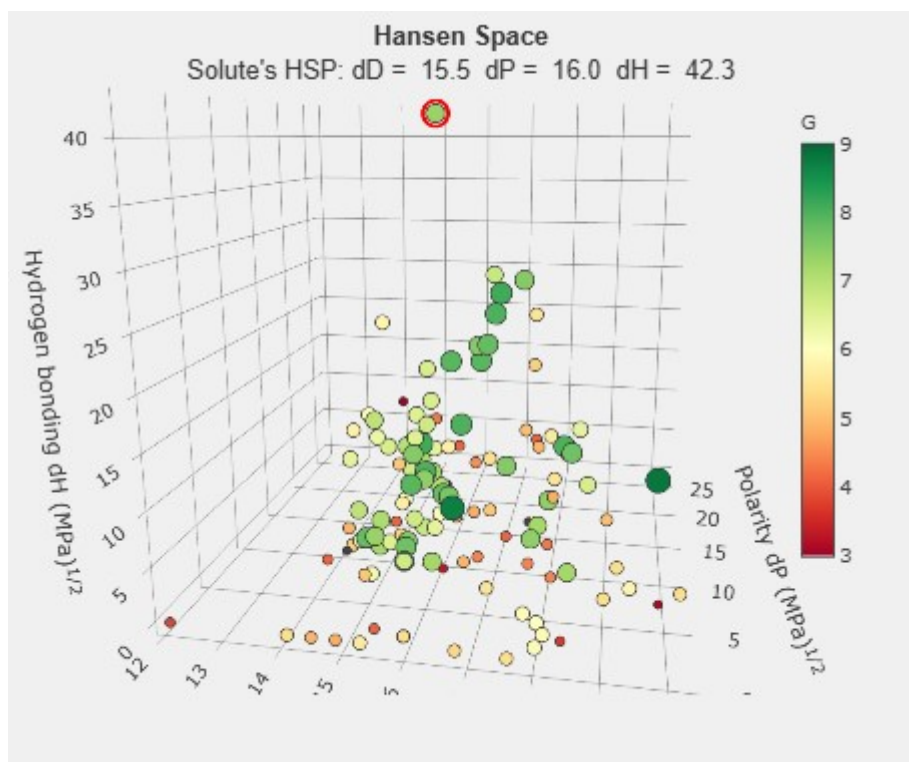

**Figure s4:** 3D Diagram with Hansen Space

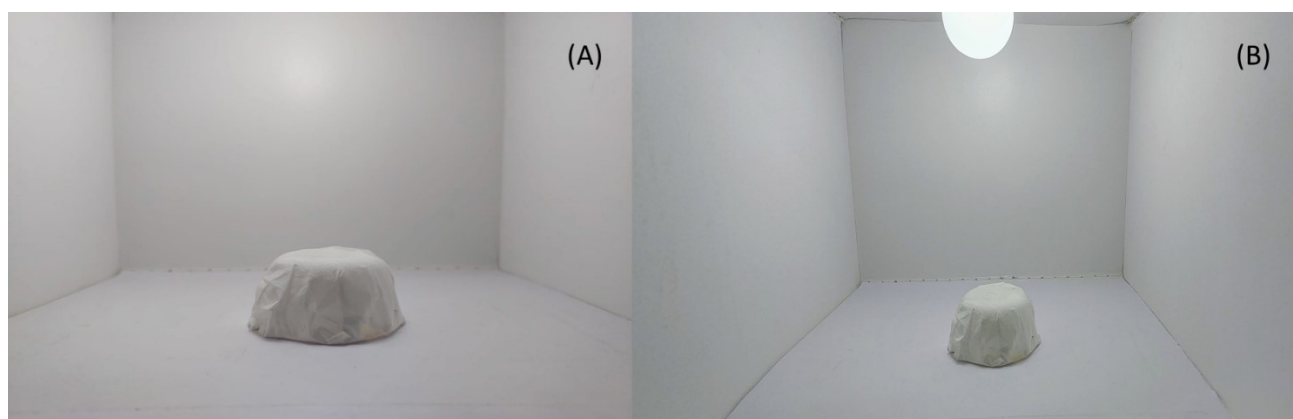

**Figure s5:** (A) Image with stage (B) Whole Setup Image for Smartphone Based Method

Capturing Point

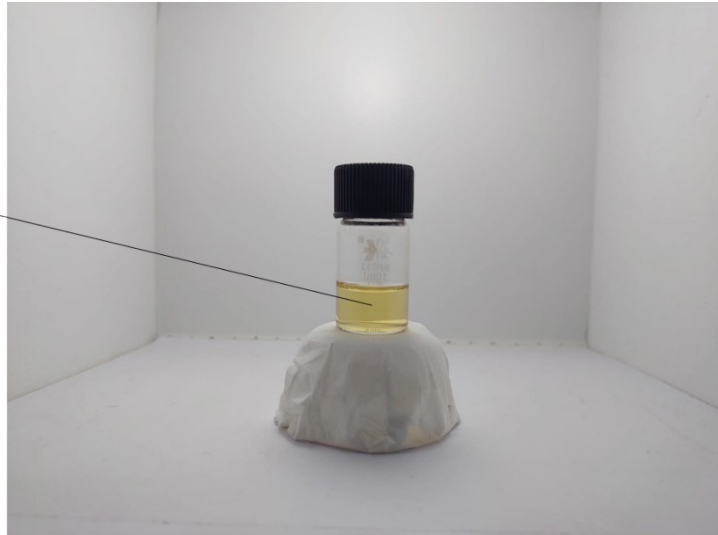

**Figure s6:** Capturing Point for Smartphone Based Vector RGB Method

Region of interest: 8 x 8

Auto sample name:

#Camera

Flash mode:  Auto  On  Off

Exposure: 0

Focus Mode: infinity

White-Balance: auto

Resolution: 640 x 480

#Exporting data

E-mail: \_\_\_\_\_

BACKUP DB RESTORE DB DELETE DB SEND DB

#Chart items

Title: 32 Sample: 34

Axis: 30 Shape: 48 Tick: 30

Invert color shape:

**Figure s7:** Settings for Photometrix Pro Software
